# Supplementary material for: A qualitative study examining transgender people’s attitudes towards having biological children and pursuing fertility treatments in Greece
Source: Research Square preprint supplement (doi:10.21203/rs.3.rs-40196/v2), 2021-01-14
Supplement: Supplementary file 1 [file 8105661bfbd9aceb80b8a430.docx]

INTERVIEW GUIDE

1. What was it like to be transgender parent / transgender individual seeking parenthood? – Could you give me some examples from your experience?
2. How do you think other people in your trans community experience transgender parenthood?
3. How has childlessness / parenthood / pursuit of parenthood impacted your life?
4. What motivates / motivated you to pursue or deny parenthood?
5. How do you think other people in your trans community experience pregnancy / fertility preservation / access to assisted reproductive technologies?
6. Could you talk about your experience with pregnancy / fertility preservation / access to assisted reproductive technologies?
7. What were some of the problems and challenges did you or other people in your trans community encounter in striving to achieve biological parenthood?
8. What do you perceive as the main barrier to pursue fertility treatment?
9. Did you experience any difficulties in this situation?
10. What would help / assist you or other people in your trans community to access fertility preservation and assisted reproductive technologies?
11. What information would you need to make better decisions about whether or not to begin or pursue fertility treatment to achieve parenthood?
